# Supplementary material for: Circulating tumour cells as a biomarker for diagnosis and staging in pancreatic cancer
Source: PubMed Central journal article supplement — Br J Cancer. 2016 Jun 14;114(12):1367–75. doi: 10.1038/bjc.2016.121 (PMC4984454; doi:10.1038/bjc.2016.121), 2016-06-14
Supplement: bjc2016121x2.pdf [file bjc2016121x2.pdf]

**Supplemental Table 1.** Characteristics of PDAC cell lines used for NanoVelcro Chip calibration, efficiency assessment, and feasibility of single cell mutational analysis.

| <b>PDAC Cell Line</b> | <b>Source</b> | <b>Differentiation</b> | <b>EpCAM Expression</b> | <b>KRAS Mutation</b> | <b>Zygoty</b> |
|-----------------------|---------------|------------------------|-------------------------|----------------------|---------------|
| CFPAC-1               | Metastasis    | Well                   | High                    | G12V                 | Heterozygous  |
| BxPC-3                | Primary       | Moderate               | Moderate                | WT*                  | WT*           |
| PANC-1                | Primary       | Poor                   | Low                     | G12D                 | Heterozygous  |
| AsPC-1                | Metastasis    | Poor                   | Moderate                | G12D                 | Homozygous    |

\*WT = Wild-type

**Supplemental Table 2.** KRAS amplification and mutation status frequencies of CTCs and WBCs analyzed. The zygosity found from the single cell KRAS sequencing trace files is listed.

| Patient | Cell Type | KRAS Amplified<br>Cells (#) | KRAS Mutated<br>Cells (#) | KRAS Mutation<br>CTC | KRAS Mutation |              |
|---------|-----------|-----------------------------|---------------------------|----------------------|---------------|--------------|
|         |           |                             |                           |                      | Homozygous    | Heterozygous |
| A       | CTC       | 17                          | 10                        | G12D                 | 8             | 2            |
|         | WBC       | 7                           | 0                         | WT                   |               |              |
| B       | CTC       | 6                           | 2                         | G12V                 | 2             | 0            |
|         | WBC       | 4                           | 0                         | WT                   |               |              |
| C       | CTC       | 3                           | 3                         | G12D                 | 3             | 0            |
|         | WBC       | 2                           | 0                         | WT                   |               |              |
| D       | CTC       | 14                          | 4                         | G12D                 | 2             | 2            |
|         | WBC       | 6                           | 0                         | WT                   |               |              |
| E       | CTC       | 4                           | 2                         | G12D                 | 2             | 0            |
|         | WBC       | 2                           | 0                         | WT                   |               |              |

  

| Patient (#) | Cell Type | Total (#) | Total (#) | KRAS<br>Mutation |    |   |
|-------------|-----------|-----------|-----------|------------------|----|---|
| All         | CTC*      | 44        | 21        | G12V, G12D       | 17 | 4 |
| All         | WBC*      | 21        | 0         | WT*              |    |   |

\*CTC = Circulating Tumor Cell (Nuc+/CK+ and/or CEA+/CD45-), WBC = White Blood Cell (Nuc +/CK-/CEA-/CD45+), Nuc = Nucleus, WT = Wild Type

**Supplemental Table 3.** Comprehensive database for enrolled patients. The table shows all patients and information used to calculate statistics and diagnostic parameters. Patients are listed in chronological order based on the date they presented to the UCLA Center for Pancreatic Diseases.

| Patient | Diagnosis <sup>d</sup> | EUS/FNA <sup>a</sup>     | Pathology (Surg/Core Bx) <sup>e</sup> | Surgery     | AJCC Stage | Tumor Size (cm) | Tumor Grade | Node Status | CTC Count per 4mL | CK+/CEA- CTCs | CEA+/CK- CTCs | CK+/CEA+ CTCs | CA 19-9 (U / mL) | Patient | Diagnosis <sup>d</sup> | EUS/FNA <sup>a</sup>     | Pathology (Surg/Core Bx) <sup>e</sup> | Surgery     | AJCC Stage | Tumor Size (cm) | Tumor Grade | Node Status | CTC Count per 4mL | CK+/CEA- CTCs | CEA+/CK- CTCs | CK+/CEA+ CTCs | CA 19-9 (U / mL) |
|---------|------------------------|--------------------------|---------------------------------------|-------------|------------|-----------------|-------------|-------------|-------------------|---------------|---------------|---------------|------------------|---------|------------------------|--------------------------|---------------------------------------|-------------|------------|-----------------|-------------|-------------|-------------------|---------------|---------------|---------------|------------------|
| 1       | Non-PDAC               |                          | Serous Cyst                           | Whipple     |            | 4               |             |             | 0                 | No            | No            | No            |                  | 51      | PDAC                   | PDAC                     | PDAC                                  | Whipple     | 2          | 3.9             | 2           | Positive    | 1                 | Yes           | No            | No            | 2                |
| 2       | Non-PDAC               | Non-Diagnostic           | MCN <sup>f</sup>                      | Distal Panc |            | 3.2             |             |             | 0                 | No            | No            | No            |                  | 52      | Non-PDAC               | SB IPMN <sup>g</sup>     | Non-PDAC                              | Whipple     | 2          | 2.4             |             |             | 0                 | No            | No            | No            |                  |
| 3       | PDAC                   | Non-Diagnostic           | PDAC                                  | Whipple     | 2          | 3.6             | 1           | Negative    | 6                 | Yes           | No            | Yes           | 1846             | 53      | PDAC                   | Non-Diagnostic           | PDAC                                  | Whipple     | 2          | 1.8             | 2           | Negative    | 0                 | No            | No            | No            |                  |
| 4       | PDAC                   | PDAC                     |                                       | ExLapMets   | 4          | 3.1             |             |             | 10                | Yes           | No            | Yes           | 3390             | 54      | PDAC                   |                          | PDAC                                  | Whipple     | 2          | 2.1             | 2           | Negative    | 2                 | No            | No            | Yes           | 24               |
| 5       | PDAC                   | PDAC                     | PDAC                                  | ExLapUrsrx  | 4          | 2.8             |             |             | 48                | Yes           | No            | No            | 4207             | 55      | PDAC                   |                          | PDAC                                  | Whipple     | 2          | 2.9             |             |             | 0                 | No            | No            | No            | 2870             |
| 6       | PDAC                   | PDAC                     |                                       | ExLapUrsrx  | 3          | 3.4             |             |             | 1                 | No            | Yes           | No            | 1263             | 56      | PDAC                   |                          | PDAC                                  | ExLapUrsrx  | 3          |                 |             |             | 1                 | Yes           | No            | No            | 64               |
| 7       | PDAC                   |                          | PDAC                                  | Whipple     | 2          | 1.5             | 2           | Positive    | 2                 | Yes           | No            | Yes           | 2504             | 57      | PDAC                   | PDAC                     | PDAC                                  | Whipple     | 2          | 3.8             |             |             | 2                 | No            | No            | Yes           | 1244             |
| 8       | PDAC                   | Non-Diagnostic           | PDAC                                  | Whipple     | 2          | 1.8             | 2           | Positive    | 2                 | Yes           | No            | Yes           | 28               | 58      | PDAC                   | PDAC                     | PDAC                                  | ExLapMets   | 4          | 4.2             | 2           |             | 13                | Yes           | No            | Yes           | 1845             |
| 9       | PDAC                   | PDAC                     |                                       |             | 3          | 3               |             |             | 0                 | No            | No            | No            | 1641             | 59      | Non-PDAC               | MD IPMN <sup>h</sup>     | MD IPMN <sup>h</sup>                  | Distal Panc |            |                 |             |             | 0                 | No            | No            | No            |                  |
| 10      | PDAC                   | PDAC                     | PDAC                                  | Distal Panc | 2          | 4.6             | 2           | Positive    | 0                 | No            | No            | No            | 327              | 60      | Non-PDAC               | SB IPMN <sup>g</sup>     |                                       |             |            |                 |             |             | 0                 | No            | No            | No            |                  |
| 11      | PDAC                   | PDAC                     |                                       |             | 61         |                 |             |             | PDAC              | PDAC          | PDAC          | PDAC          | ExLapUrsrx       | 3       | 2.2                    |                          |                                       |             |            |                 |             |             | 3                 | Yes           | No            | Yes           | 3                |
| 12      | Non-PDAC               | Complex Cyst             |                                       |             | 4          | 1.2             | 1           |             | 9                 | Yes           | No            | No            | 160              | 62      | PDAC                   |                          | PDAC                                  | Whipple     | 2          | 2.7             | 2           | Positive    | 1                 | No            | No            | Yes           | 306              |
| 13      | PDAC                   | PDAC                     |                                       |             | 3          | 3.7             |             |             | 1                 | Yes           | No            | No            | 1096             | 63      | Non-PDAC               | MD IPMN <sup>h</sup>     | MD IPMN <sup>h</sup>                  | Whipple     |            |                 |             |             | 0                 | No            | No            | No            |                  |
| 14      | PDAC                   | PDAC                     | PDAC                                  | Whipple     | 2          | 4.4             | 3           | Positive    | 0                 | No            | No            | No            | 27               | 64      | PDAC                   | Non-Diagnostic           | PDAC                                  | ExLapMets   | 4          |                 |             |             | 14                | Yes           | No            | No            |                  |
| 15      | Non-PDAC               | Atypical                 | MD IPMN <sup>h</sup>                  | Whipple     |            | 2.7             |             |             | 0                 | No            | No            | No            |                  | 65      | PDAC                   |                          |                                       |             | 4          |                 |             |             | 4                 | Yes           | No            | No            |                  |
| 16      | PDAC                   | PDAC                     |                                       |             | 4          | 3.8             | 2           |             | 16                | Yes           | No            | No            | 3817             | 66      | PDAC                   | PDAC                     | PDAC                                  | Distal Panc | 1          | 1.8             | 1           | Negative    | 0                 | No            | No            | No            | 12               |
| 17      | PDAC                   | PDAC                     |                                       |             | 4          | 2.5             | 3           |             | 10                | Yes           | No            | Yes           | 621              | 67      | PDAC                   | PDAC                     |                                       |             | 3          | 4.6             |             |             | 0                 | No            | No            | No            |                  |
| 18      | PDAC                   | PDAC                     |                                       |             | 4          | 2.7             |             |             | 5                 | Yes           | No            | Yes           | 3317             | 68      | PDAC                   | PDAC                     | PDAC                                  | Whipple     | 2          | 1.9             | 3           | Positive    | 0                 | No            | No            | No            | 103              |
| 19      | PDAC                   | PDAC                     |                                       |             | 4          | 1.5             |             |             | 5                 | Yes           | Yes           | Yes           | 180              | 69      | Non-PDAC               | Non-Diagnostic           | MD IPMN <sup>h</sup>                  | Whipple     |            |                 |             |             | 0                 | No            | No            | No            |                  |
| 20      | PDAC                   | PDAC                     |                                       | ExLapMets   | 3          | 5.8             |             |             | 2                 | No            | No            | Yes           |                  | 70      | PDAC                   | PDAC                     | PDAC                                  | Whipple     | 2          | 5               | 3           | Positive    | 0                 | No            | No            | No            | 222              |
| 21      | PDAC                   | PDAC                     | PDAC                                  | ExLapMets   | 4          |                 | 2           |             | 10                | No            | Yes           | No            |                  | 71      | PDAC                   | PDAC                     | PDAC                                  | Whipple     | 2          | 2.3             | 2           | Positive    | 0                 | No            | No            | No            | 35               |
| 22      | Non-PDAC               | Inflammation/Atypical    | Chronic Pancreatitis                  |             |            |                 |             |             | 0                 | No            | No            | No            |                  | 72      | PDAC                   | PDAC                     |                                       |             | 4          |                 |             |             | 5                 | Yes           | No            | No            |                  |
| 23      | PDAC                   | PDAC                     | PDAC                                  | Whipple     | 2          | 2               | 1           | Positive    | 2                 | No            | No            | Yes           | 7                | 73      | PDAC                   | PDAC                     |                                       |             | 4          | 4               | 4           |             | 47                | Yes           | No            | No            | 43               |
| 24      | Non-PDAC               | No Lesion                |                                       |             |            |                 |             |             | 0                 | No            | No            | No            |                  | 74      | PDAC                   |                          | PDAC                                  |             | 4          | 5.4             |             |             | 4                 | Yes           | No            | Yes           | 111074           |
| 25      | Non-PDAC               | SB IPMN <sup>g</sup>     |                                       |             |            | 3.5             |             |             | 0                 | No            | No            | No            |                  | 75      | PDAC                   | PDAC                     | PDAC                                  | ExLapMets   | 4          | 2.3             |             |             | 3                 | Yes           | No            | No            | 36               |
| 26      | Non-PDAC               | SB IPMN <sup>g</sup>     |                                       |             |            | 3.2             |             |             | 0                 | No            | No            | No            |                  | 76      | PDAC                   | Non-Diagnostic           | PDAC                                  | Whipple     | 2          | 3.5             | 2           | Positive    | 1                 | Yes           | No            | No            | 1008             |
| 27      | PDAC                   | PDAC                     | PDAC                                  | Whipple     | 4          | 6.6             | 3           |             | 2                 | No            | No            | Yes           | 65500            | 77      | Non-PDAC               | Non-Diagnostic           | MD IPMN <sup>h</sup>                  | Whipple     | 0          |                 |             |             | 0                 | No            | No            | No            |                  |
| 28      | PDAC                   | PDAC                     | PDAC                                  | Whipple     | 2          | 10.5            | 2           | Positive    | 2                 | Yes           | No            | No            | 980              | 78      | Non-PDAC               | MD IPMN <sup>h</sup>     | MD IPMN <sup>h</sup>                  | Whipple     | 0          |                 |             |             | 0                 | No            | No            | Yes           |                  |
| 29      | PDAC                   | PDAC                     | PDAC                                  | Whipple     | 2          | 4.5             | 2           | Positive    | 1                 | No            | Yes           | No            | 94               | 79      | PDAC                   | PDAC                     | PDAC                                  | Whipple     | 2          | 2.1             | 2           | Negative    | 0                 | No            | No            | No            |                  |
| 30      | PDAC                   | PDAC                     |                                       |             | 4          |                 |             |             | 0                 | No            | No            | No            | 25684            | 80      | PDAC                   | Non-Diagnostic           | PDAC                                  | ExLapMets   | 4          |                 |             |             | 4                 | Yes           | No            | No            | 668              |
| 31      | PDAC                   | PDAC                     | PDAC                                  |             | 3          | 4.2             |             |             | 1                 | No            | Yes           | No            | 1424             | 81      | PDAC                   | PDAC                     | PDAC                                  |             | 4          | 2.9             |             |             | 3                 | Yes           | No            | No            | 42               |
| 32      | PDAC                   | PDAC                     |                                       | ExLapMets   | 4          | 3.9             | 3           |             | 1                 | Yes           | No            | No            | 16               | 82      | PDAC                   | PDAC                     | PDAC                                  | Distal Panc | 2          | 5               | 2           | Positive    | 1                 | Yes           | No            | No            | 3                |
| 33      | Non-PDAC               |                          | Pseudocyst                            | Distal Panc |            | 3.6             |             |             | 0                 | No            | No            | No            |                  | 83      | PDAC                   | PDAC                     | PDAC                                  | Whipple     | 2          | 3.7             | 2           | Positive    | 0                 | No            | No            | No            | 3                |
| 34      | Non-PDAC               | MD IPMN <sup>h</sup>     |                                       |             |            | 1.2             |             |             | 0                 | No            | No            | No            |                  | 84      | Non-PDAC               | PDAC                     | PDAC                                  | ExLapUrsrx  | 3          | 1.9             |             |             | 6                 | No            | No            | No            | 1110             |
| 35      | PDAC                   | PDAC                     |                                       |             | 3          | 3.5             |             |             | 1                 | No            | Yes           | No            | 3                | 85      | PDAC                   | PDAC                     |                                       |             | 2          | 1.9             |             |             | 2                 | Yes           | No            | No            |                  |
| 36      | Non-PDAC               | MD IPMN <sup>h</sup>     |                                       |             |            | 2.3             |             |             | 0                 | No            | No            | No            |                  | 86      | PDAC                   | PDAC                     | PDAC                                  | Whipple     | 2          | 3.6             | 2           | Positive    | 0                 | No            | No            | No            | 1                |
| 37      | Non-PDAC               |                          | Serous Cyst                           | Whipple     |            | 1.9             |             |             | 0                 | No            | No            | No            |                  | 87      | Non-PDAC               |                          | MD IPMN <sup>h</sup>                  | Whipple     | 0          |                 |             |             | 0                 | No            | No            | No            |                  |
| 38      | Non-PDAC               | PNET <sup>i</sup>        | PNET <sup>i</sup>                     | Distal Panc |            | 0.5             | 1           | Negative    | 0                 | No            | No            | No            |                  | 88      | PDAC                   | PDAC                     | PDAC                                  |             | 4          | 6.9             | 3           |             | 3                 | Yes           | No            | Yes           | 24               |
| 39      | PDAC                   | PDAC                     |                                       |             | 4          | 6.4             |             |             | 1                 | Yes           | No            | No            | 119042           | 89      | PDAC                   | PDAC                     | PDAC                                  | Whipple     | 2          | 2.6             | 2           | Positive    | 1                 | Yes           | No            | No            | 168              |
| 40      | PDAC                   | PDAC                     | PDAC                                  | ExLapMets   | 4          | 3.2             | 3           |             | 3                 | No            | No            | Yes           | 679              | 90      | PDAC                   | PDAC                     | PDAC                                  | Distal Panc | 2          | 5.5             | 3           | Positive    | 1                 | Yes           | No            | No            |                  |
| 41      | PDAC                   | PDAC                     | PDAC                                  |             | 3          | 2.3             | 3           |             | 2                 | No            | No            | Yes           | 159              | 91      | PDAC                   | PDAC                     |                                       |             | 4          |                 |             |             | 7                 | Yes           | No            | No            | 121              |
| 42      | Non-PDAC               | Serous Cyst <sup>j</sup> |                                       |             |            | 1.8             |             |             | 0                 | No            | No            | No            |                  | 92      | PDAC                   |                          | PDAC                                  | Whipple     | 1          | 2.8             | 2           | Negative    | 0                 | No            | No            | No            |                  |
| 43      | Non-PDAC               | PNET <sup>i</sup>        | PNET <sup>i</sup>                     | Distal Panc |            | 1.4             | 1           | Negative    | 0                 | No            | No            | No            |                  | 93      | Non-PDAC               | Serous Cyst <sup>j</sup> | Serous Cyst                           | Whipple     | 0          |                 |             |             | 0                 | No            | No            | No            |                  |
| 44      | PDAC                   | PDAC                     |                                       |             | 2          | 3.5             | 1           |             | 1                 | Yes           | No            | No            |                  | 94      | Non-PDAC               |                          | MCN <sup>f</sup>                      | Distal Panc | 0          |                 |             |             | 0                 | No            | No            | No            |                  |
| 45      | PDAC                   | PDAC                     | PDAC                                  | Distal Panc | 1          | 6.6             | 1           | Negative    | 0                 | No            | No            | No            | 361              | 95      | PDAC                   | PDAC                     |                                       |             | 4          | 4               |             |             | 6                 | No            | No            | Yes           | 386              |
| 46      | Non-PDAC               | MD IPMN <sup>h</sup>     |                                       |             |            | 2               |             |             | 0                 | No            | No            | No            |                  | 96      | PDAC                   | PDAC                     | PDAC                                  | Whipple     | 2          | 4.1             | 2           | Positive    | 3                 | No            | No            | Yes           | 415              |
| 47      | PDAC                   | PDAC                     |                                       |             | 4          | 5.3             | 3           |             | 3                 | Yes           | No            | Yes           | 765              | 97      | PDAC                   | PDAC                     |                                       |             | 2          | 1.7             |             |             | 0                 | No            | No            | No            | 29               |
| 48      | Non-PDAC               | Atypical                 | MD IPMN <sup>h</sup>                  | Whipple     |            | 4               |             |             | 0                 | No            | No            | No            |                  | 98      | Non-PDAC               | PDAC                     |                                       |             | 4          |                 |             |             | 6                 | No            | No            | Yes           |                  |
| 49      | Non-PDAC               | No Lesion                |                                       |             |            |                 |             |             | 0                 | No            | No            | No            |                  | 99      | PDAC                   | PDAC                     |                                       | ExLapUrsrx  | 3          | 4               |             |             | 9                 | No            | No            | Yes           | 2261             |
| 50      | PDAC                   | PDAC                     |                                       |             | 3          | 2               |             |             | 0                 | No            | No            | No            |                  | 100     | PDAC                   | PDAC                     | PDAC                                  | ExLapUrsrx  | 3          |                 |             |             | 4                 | Yes           | No            | Yes           | 137              |

\*Indicates probable diagnosis based on image appearance, EUS characterization, lack of malignant cells on FNA, and cyst fluid analysis.  
a: SB IPMN = Side Branch Intraductal Papillary Mucinous Neoplasm, b: MD IPMN = Main Duct Intraductal Papillary Mucinous Neoplasm, c: PNET = Pancreatic Neuroendocrine Tumor, d: MCN = Mucinous Cystic Neoplasm, e: PDAC = Pancreatic Ductal Adenocarcinoma

**Supplemental Table 4.** Diagnostic parameters for CTCs and CA 19-9 at various cut-off values.

**Diagnostic Parameters for Metastatic Disease**

| CTC Cut-Off    | Sensitivity  | Specificity  | PPV          | NPV          | Youden's Index |
|----------------|--------------|--------------|--------------|--------------|----------------|
| ≥ 1 CTC        | 0.963        | 0.378        | 0.481        | 0.944        | 0.341          |
| ≥ 2 CTC        | 0.889        | 0.667        | 0.615        | 0.909        | 0.556          |
| <b>≥ 3 CTC</b> | <b>0.852</b> | <b>0.867</b> | <b>0.793</b> | <b>0.907</b> | <b>0.719</b>   |
| ≥ 4 CTC        | 0.667        | 0.911        | 0.818        | 0.820        | 0.578          |
| ≥ 10 CTC       | 0.296        | 1.000        | 1.000        | 0.703        | 0.296          |

**Diagnostic Parameters for Metastatic Disease**

| CA19-9 Cut-Off | Sensitivity  | Specificity  | PPV          | NPV          | Youden's Index |
|----------------|--------------|--------------|--------------|--------------|----------------|
| ≥ 100          | 0.783        | 0.417        | 0.462        | 0.750        | 0.199          |
| ≥ 500          | 0.609        | 0.667        | 0.538        | 0.727        | 0.275          |
| ≥ 1000         | 0.391        | 0.694        | 0.450        | 0.641        | 0.086          |
| ≥ 2500         | 0.348        | 0.944        | 0.800        | 0.694        | 0.292          |
| <b>≥ 3000</b>  | <b>0.348</b> | <b>1.000</b> | <b>1.000</b> | <b>0.706</b> | <b>0.348</b>   |

**Diagnostic Parameters for PDAC**

| CTC Cut-Off    | Sensitivity  | Specificity  | PPV          | NPV          | Youden's Index |
|----------------|--------------|--------------|--------------|--------------|----------------|
| <b>≥ 1 CTC</b> | <b>0.750</b> | <b>0.964</b> | <b>0.982</b> | <b>0.600</b> | <b>0.714</b>   |
| ≥ 2 CTC        | 0.542        | 1.000        | 1.000        | 0.450        | 0.542          |
| ≥ 3 CTC        | 0.403        | 1.000        | 1.000        | 0.394        | 0.403          |
| ≥ 4 CTC        | 0.306        | 1.000        | 1.000        | 0.231        | 0.306          |
| ≥ 10 CTC       | 0.111        | 1.000        | 1.000        | 0.207        | 0.111          |

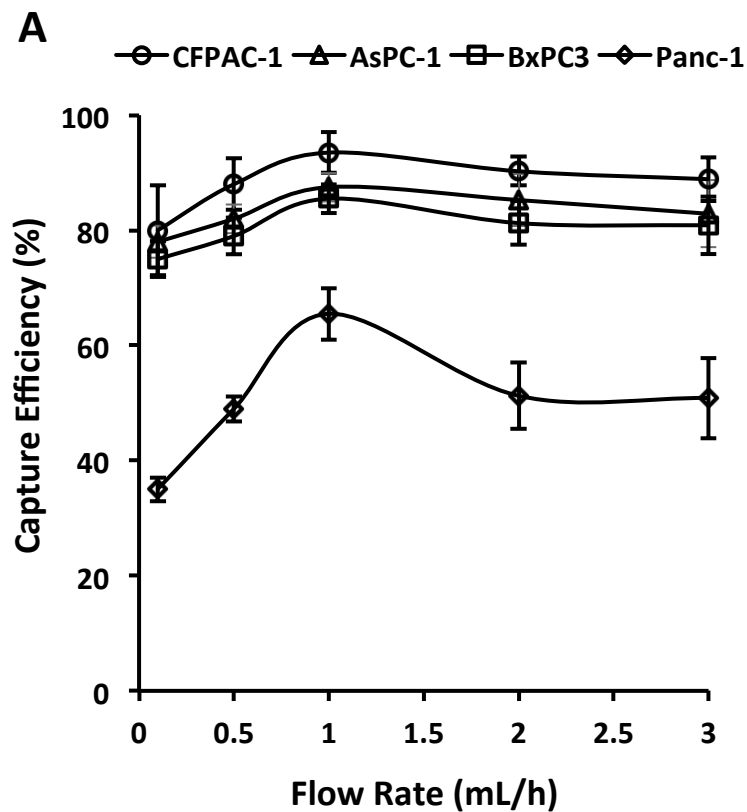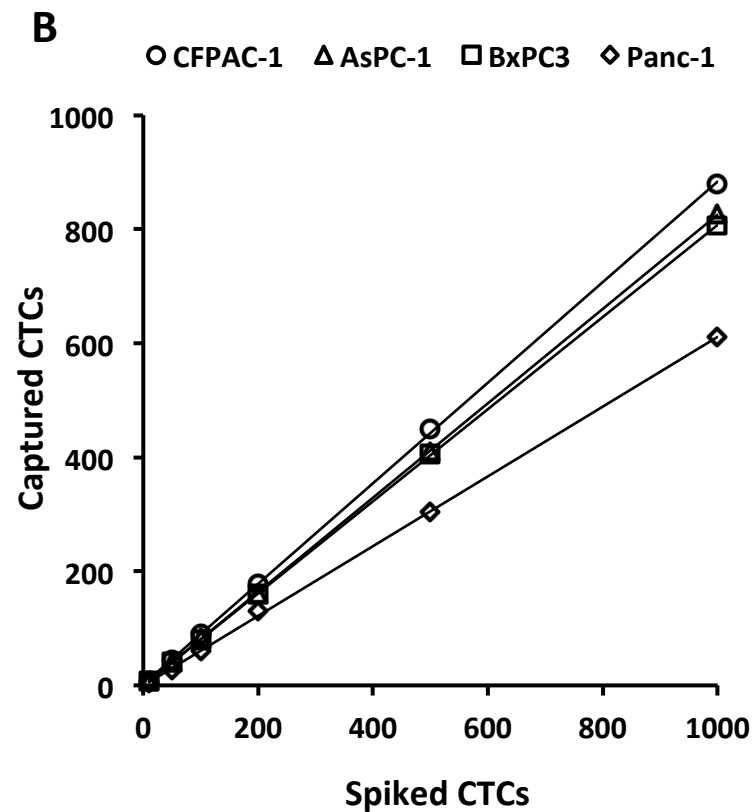

**Supplemental Figure 1.** Calibration curves and capture efficiency data for PDAC cell lines. **(A)** Diagram of capture efficiency for CFPAC-1, AsPC-1, BxPC-3, and PANC-1 as a function of NanoVelcro device flow rates. **(B)** Capture efficiency of CFPAC-1, AsPC-1, BxPC-3, and PANC-1 as a function of the number of captured cells versus the number spiked into the artificial sample.

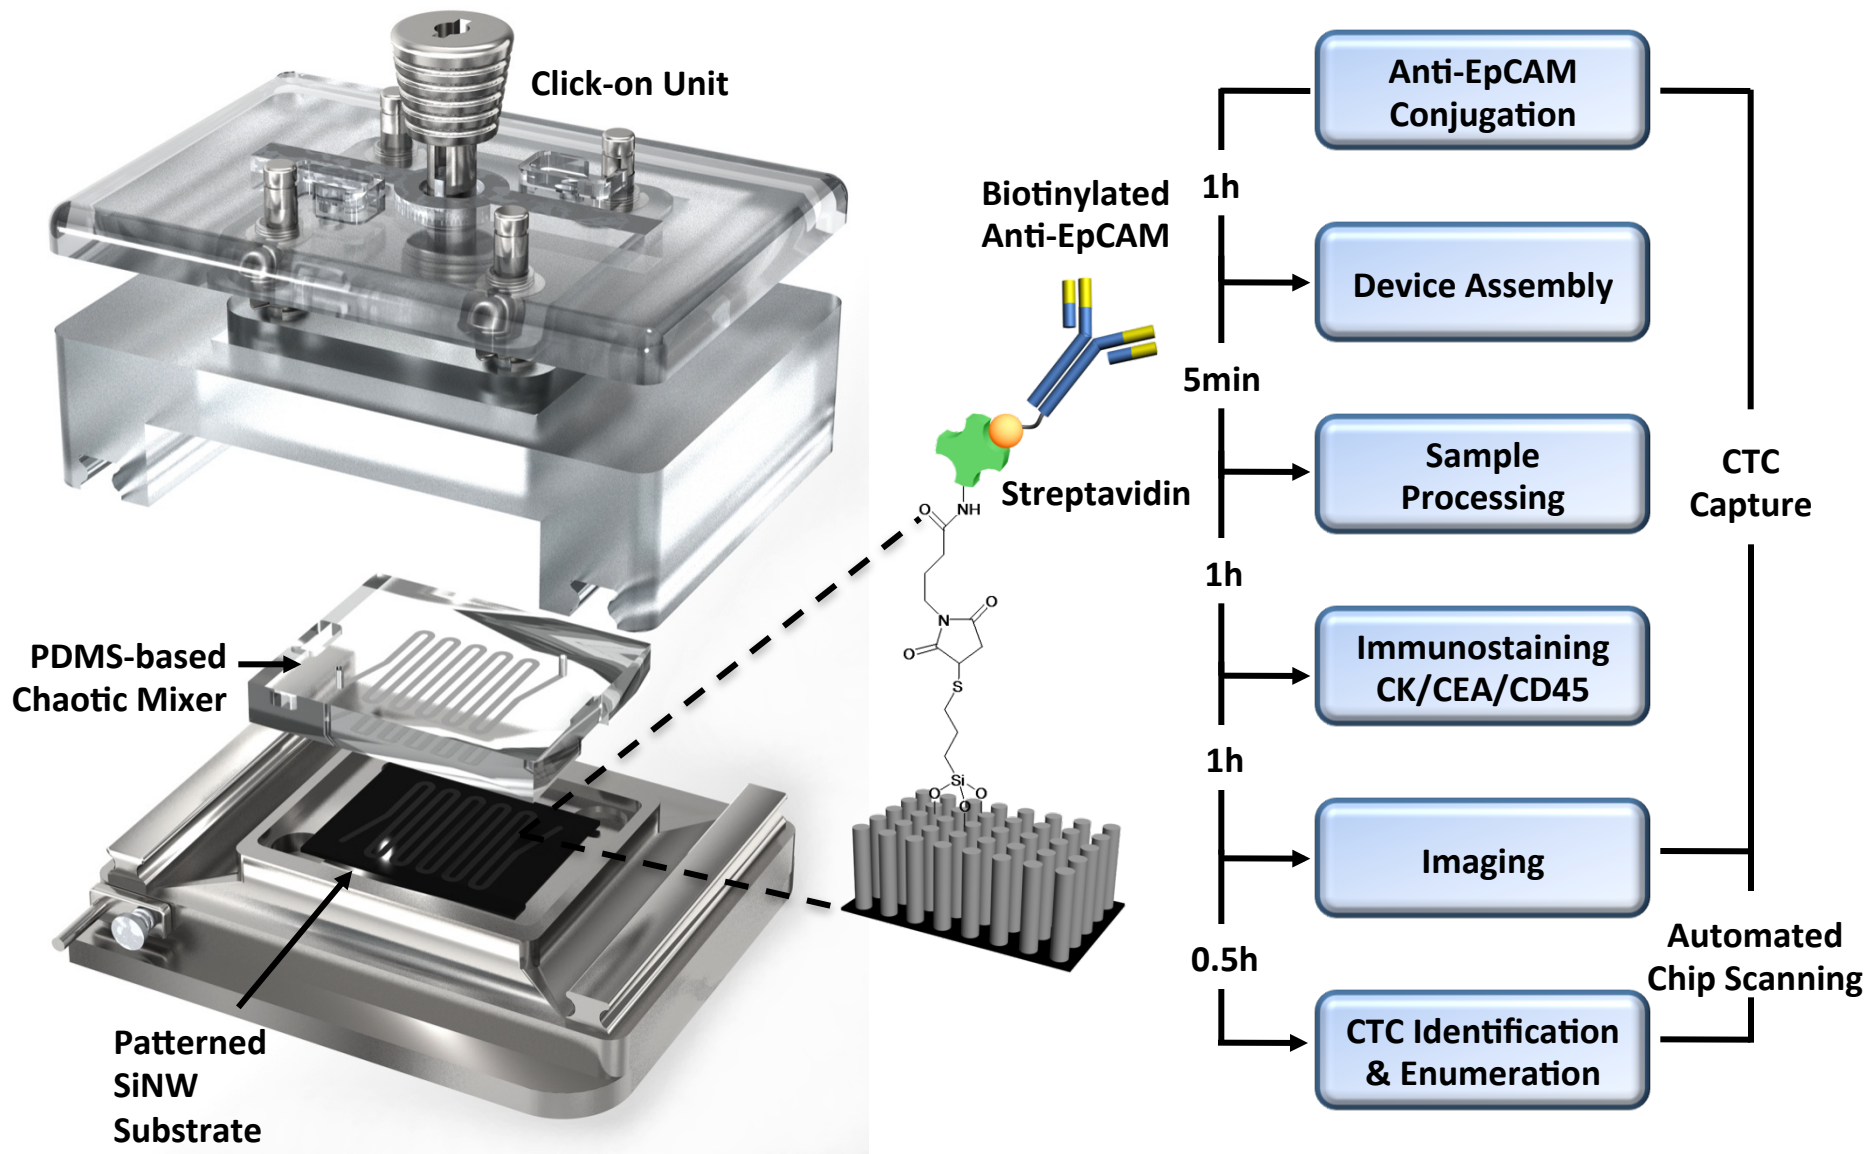

**Supplemental Figure 2.** General workflow diagram for CTC capture, identification, and enumeration on SiNS NanoVelcro Chips. The schematic shows the individual components of SiNS NanoVelcro Chips, chip holding device, and elements/duration of the workflow for processing a typical blood sample.

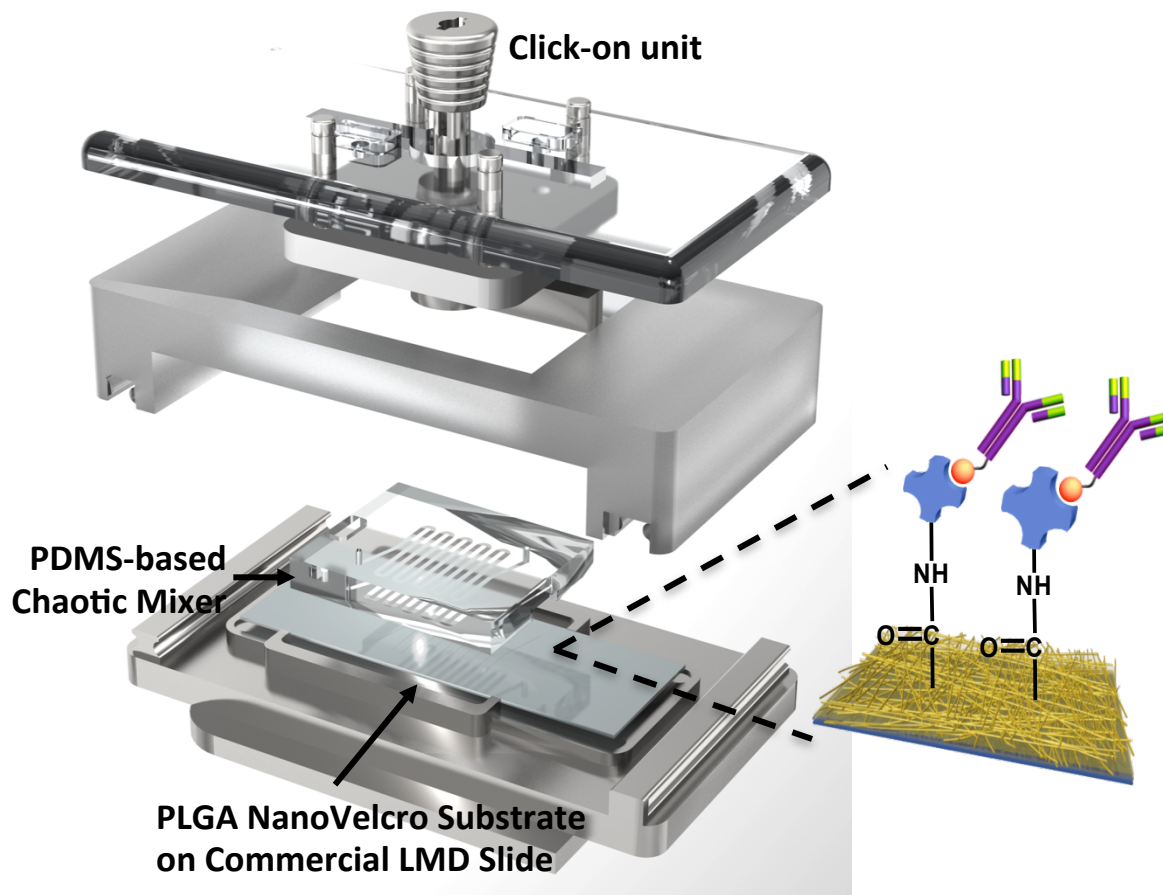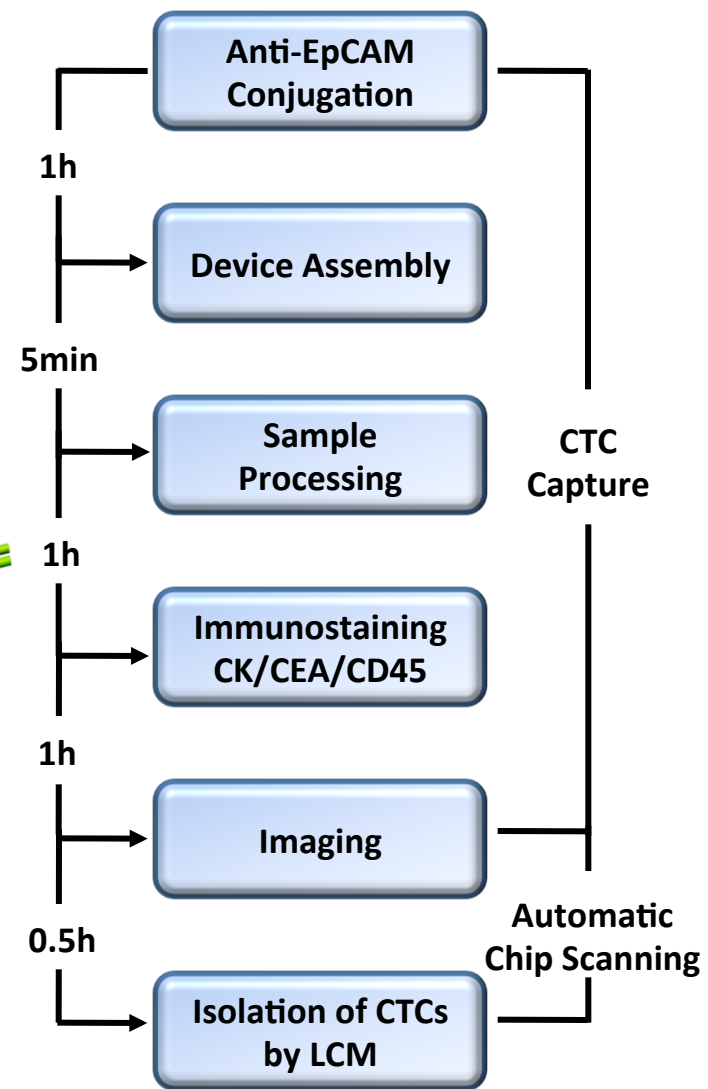

**Supplemental Figure 3.** General workflow diagram for CTC capture, identification, and LCM of single CTCs on NanoVelcro/LCM Chips. Individual components of the NanoVelcro/LCM chips and holding device are shown in the schematic at the right.

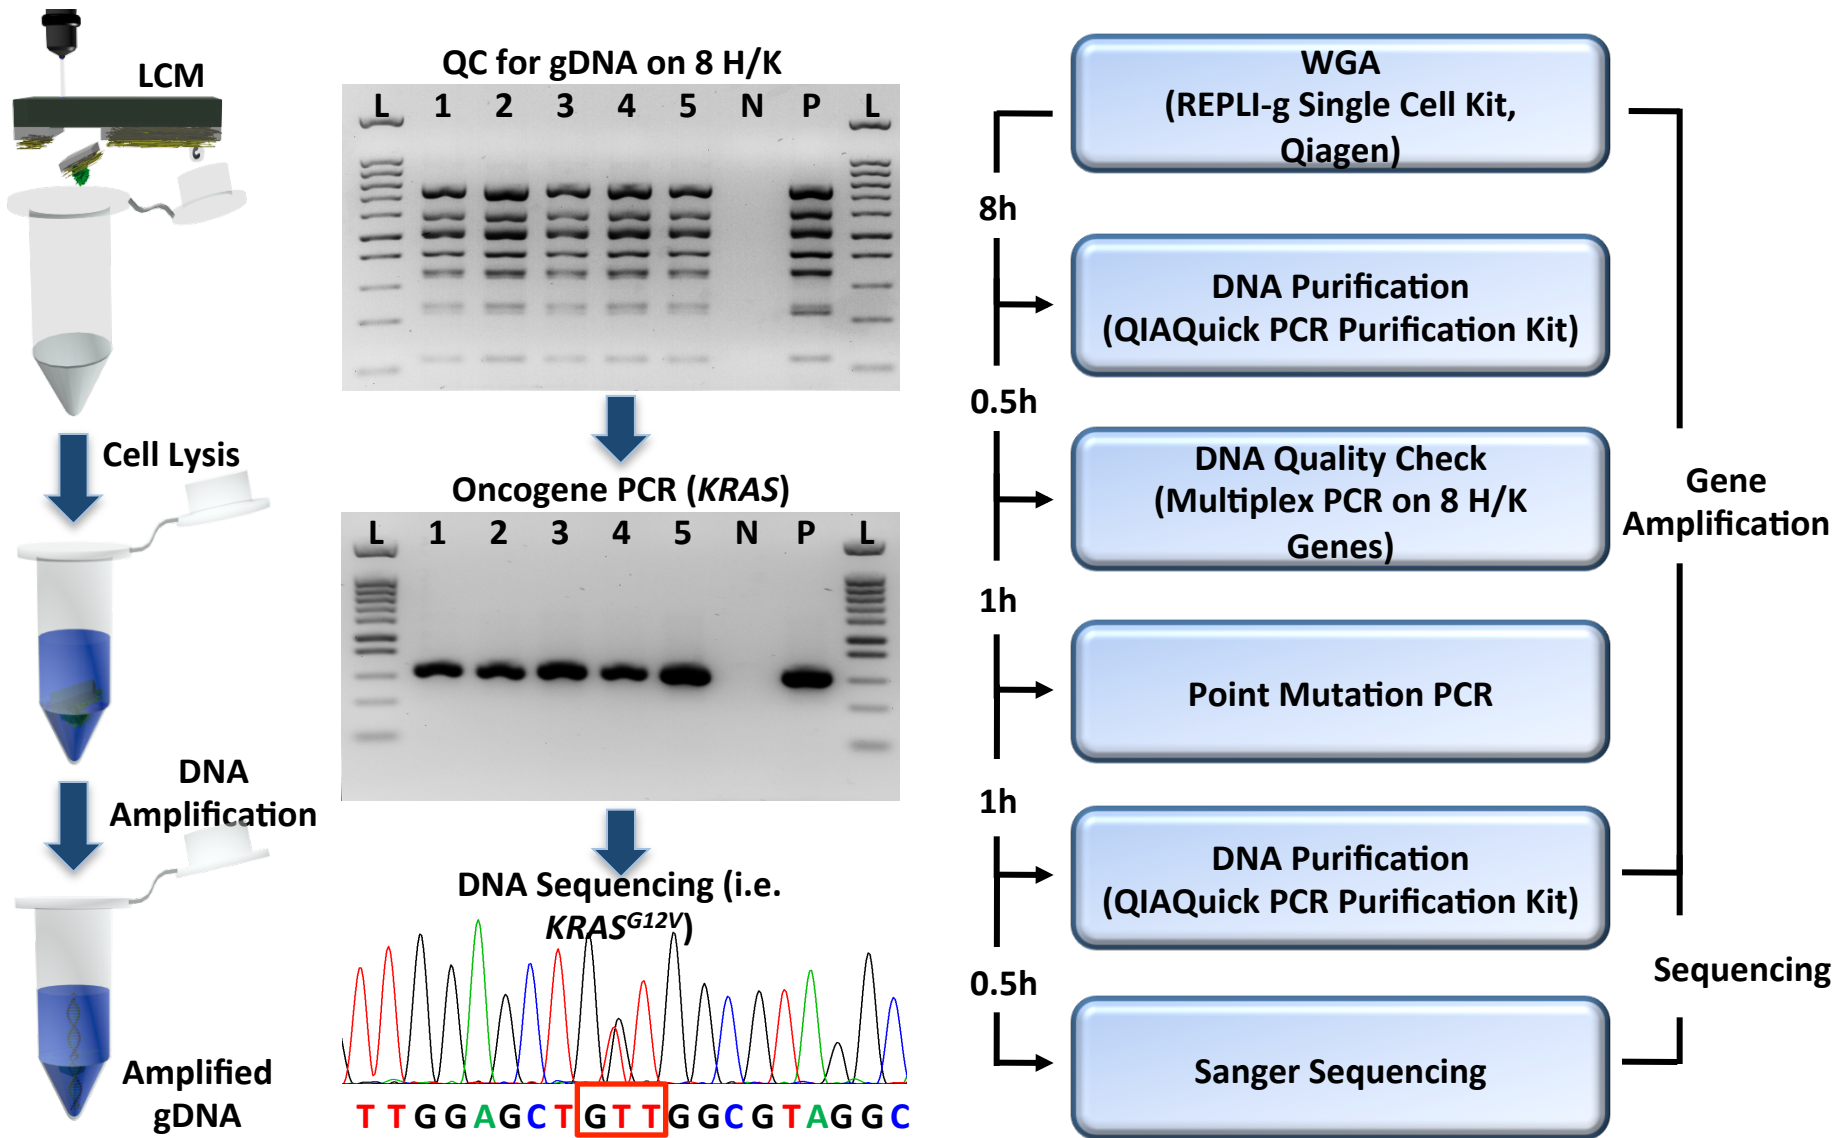

**Supplemental Figure 4.** General workflow diagram for the process of single-CTC whole genome amplification, DNA quality assessment, and targeted mutational analysis of *KRAS* via PCR and Sanger Sequencing. H/K Genes – Housekeeping Genes



## AsPC-1

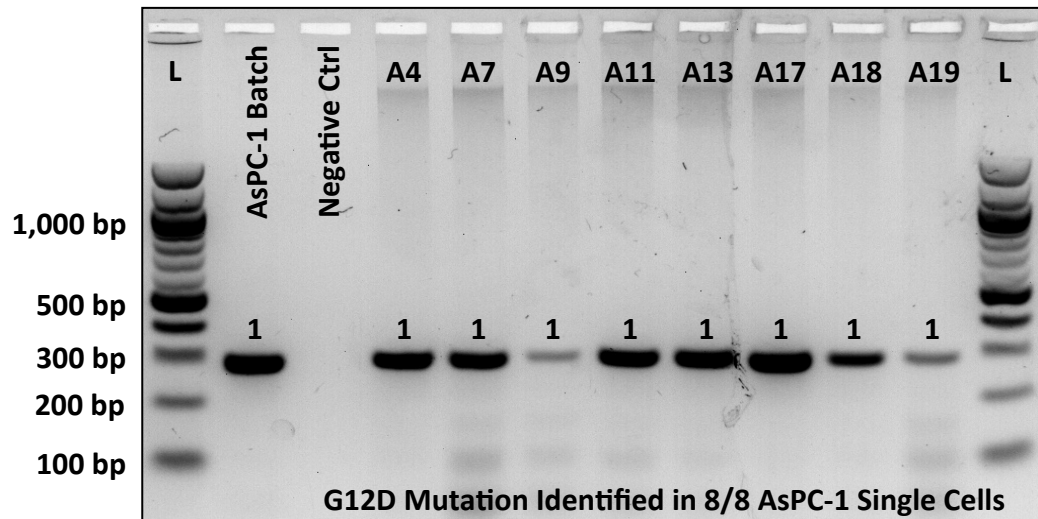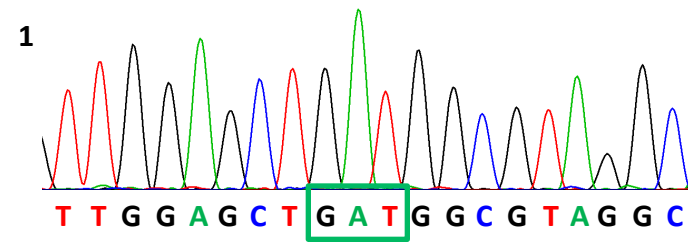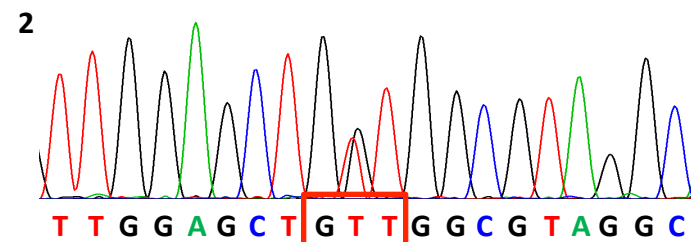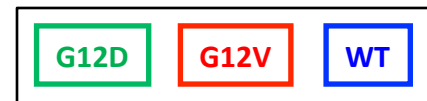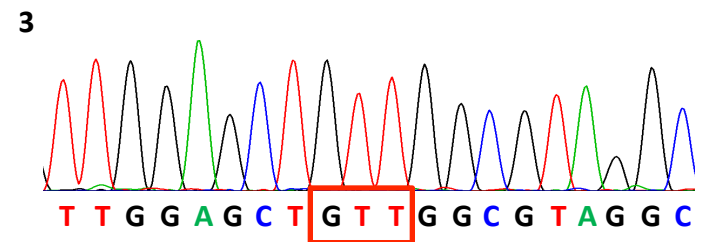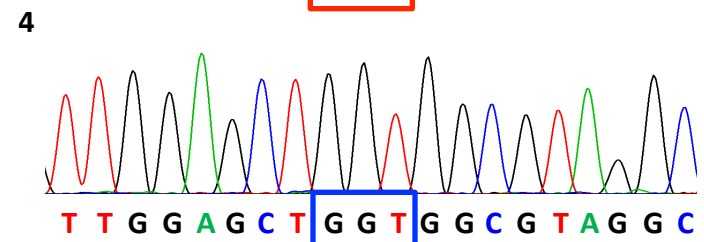

## CFPAC-1

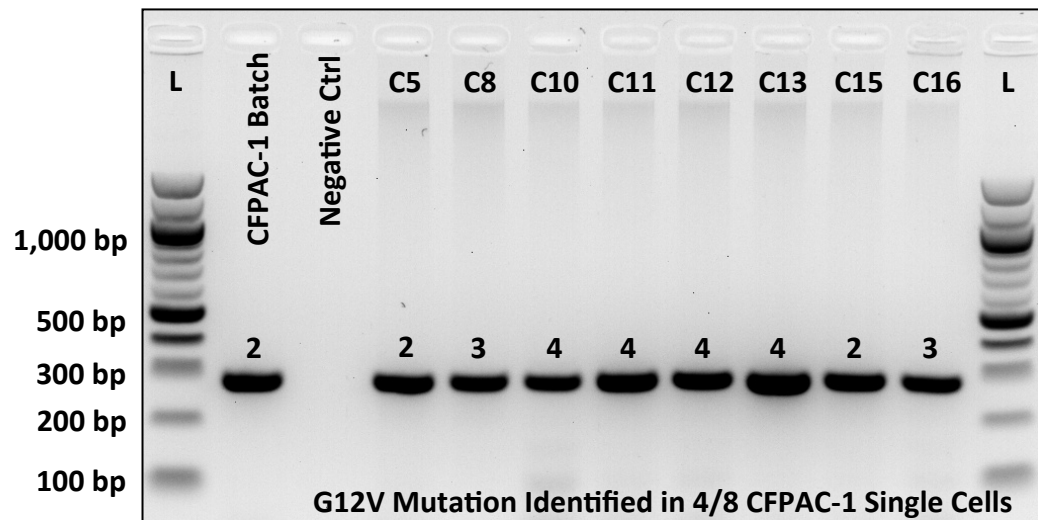

**Supplemental Figure 5.** Targeted mutational analysis of *KRAS* codon 12 via PCR and Sanger Sequencing in PDAC cell lines. *KRAS* PCR of batch cellular DNA and WGA of single cells are shown in the agarose gels at the left for AsPC-1 (G12D Homozygote) and CFPAC-1 (G12V Heterozygote). The expected PCR product shows a band at ~300 bp. The accompanying chromatograms shown at the right are representations of the different Sanger Sequencing results obtained. *JKRAS* mutation subtype is indicated by the colored boxes. The numeric labels over the bands in the agarose gels indicate the corresponding chromatogram/sequencing result shown on the right.

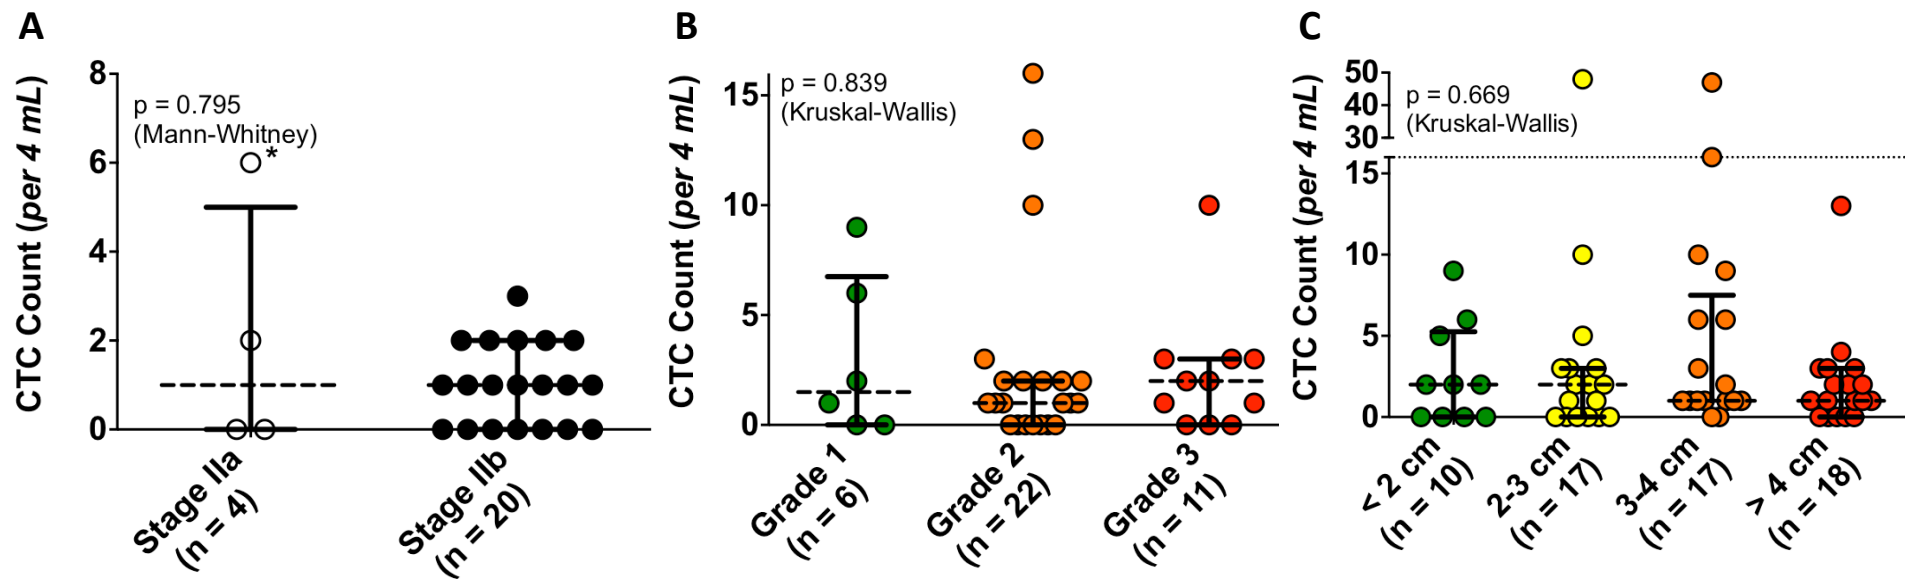

**Supplemental Figure 6.** Additional statistical analysis. **(A)** Comparison of CTC counts between node-negative (Stage IIa) and node-positive (Stage IIb) patients reveals no significance ( $p = 0.795$ ). **(B)** Comparison of CTC counts between patients with different tumor grades reveals no significance ( $p = 0.839$ ). **(C)** Comparison of CTC counts and tumor size reveals no significance ( $p = 0.669$ ).
